# Supplementary material
Source: publisher site journal article supplement (https://www.dovepress.com/article/439982)
Supplement: Supplementary file 1 [file get_supplementary_file.php]

# Supplementary material

**Supplementary Figure 1**

1. Sensitivity analysis: Changes to the environmental footprint in percent assuming that all electricity consumed at the reprocessing plant in Florida is 100% renewable (wind and solar energy in equal measures)


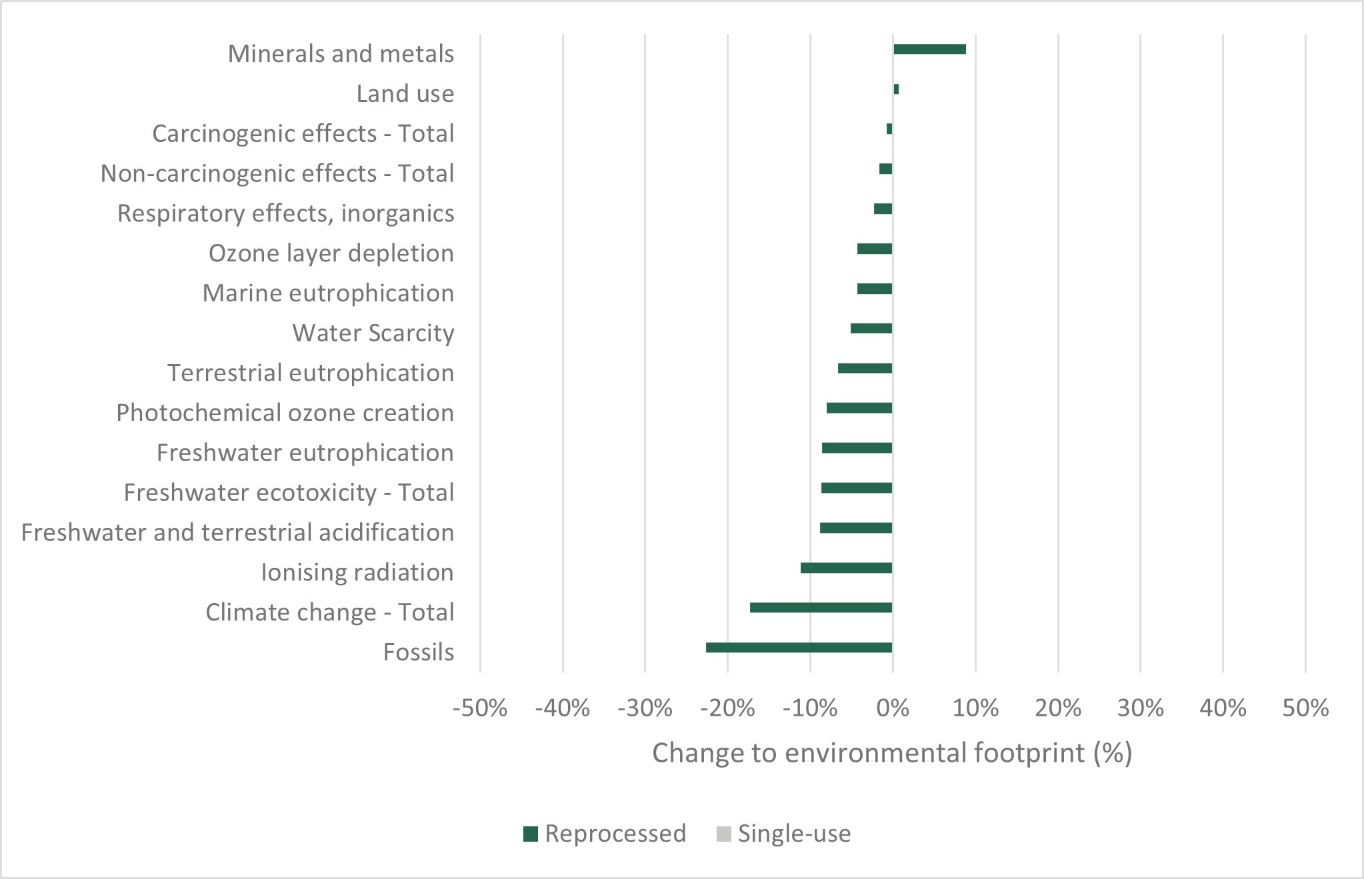


1. Sensitivity analysis: Changes to the environmental footprint in percent assuming that all ethylene oxide used in high-level disinfection during IPC sleeve reprocessing is emitted into the air


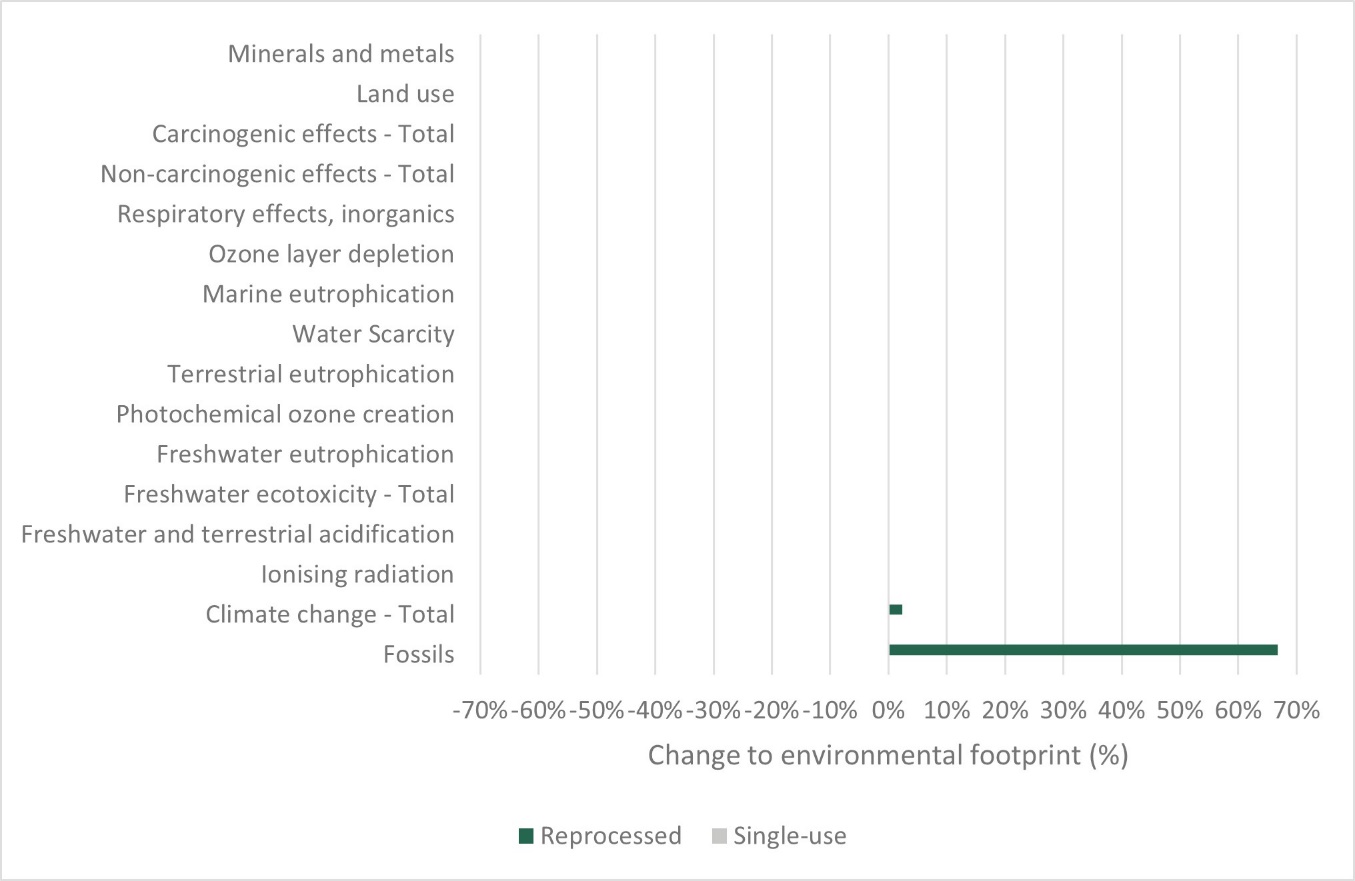


1. Sensitivity analysis: Changes to the environmental footprint in percent assuming that 50% more transports are required (for both single-use and reprocessed IPC sleeves)


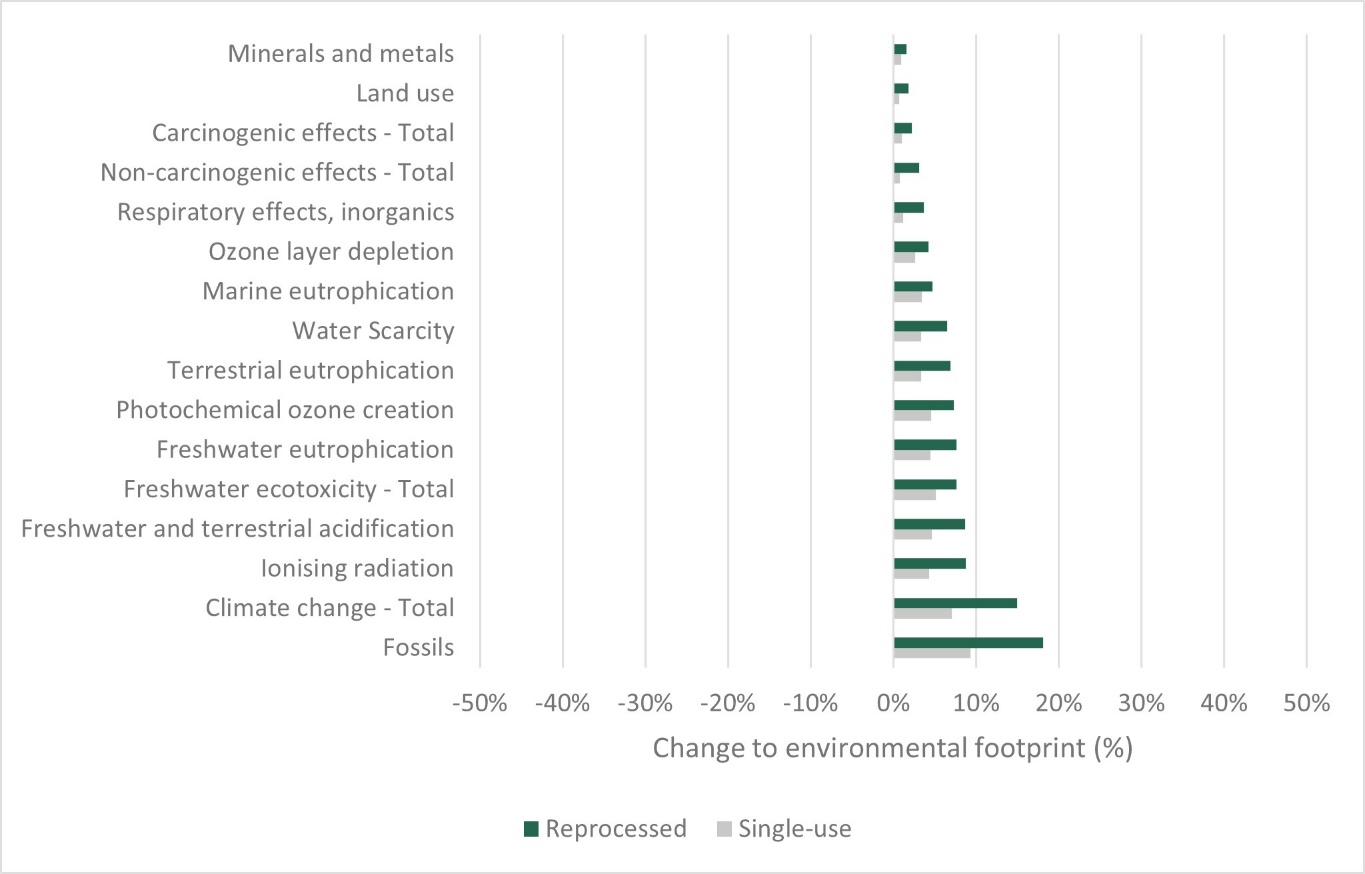


1. Sensitivity analysis: Changes to the environmental footprint in percent assuming that transport distances are 50% shorter for reprocessing IPC sleeves


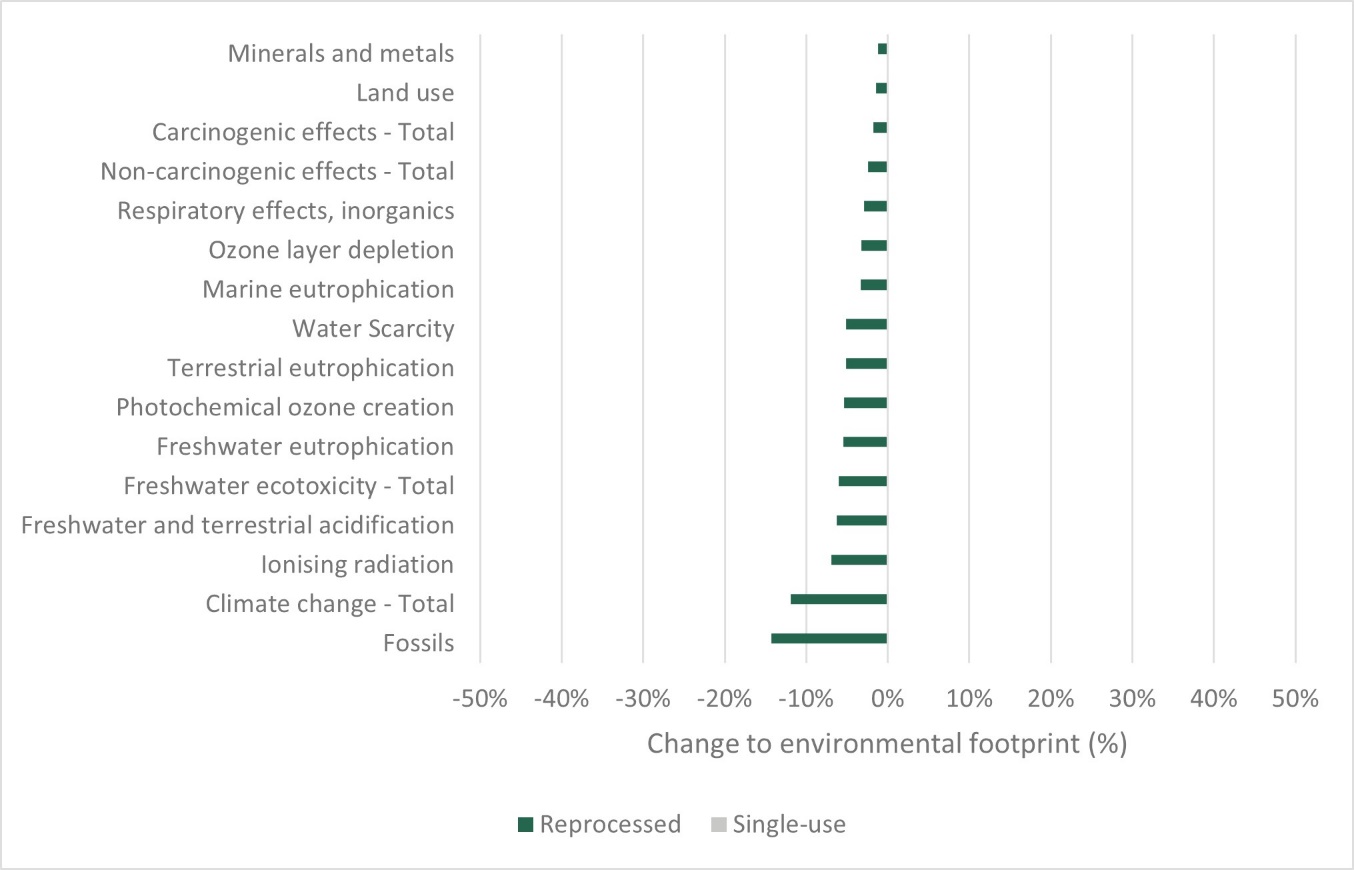


**Supplementary Table 1** Main drivers of most relevant normalized impact categories

| **Single-use IPC sleeve** | **Reprocessed IPC sleeve** |
| --- | --- |
| **Freshwater ecotoxicity** | |
| 1. Sheet production (polyester laminated with polyester) 2. Cardboard box (IPC product packaging) 3. Cardboard box (packaging of pre-component hot stamp) | 1. Cardboard box (IPC product packaging) 2. Deionized water (reprocessing facility) 3. Sheet production (polyester laminated with polyester) |
| **Fossils** | |
| 1. Sheet production (polyester laminated with polyester) 2. Loop sheet production (nylon) 3. Cardboard box (IPC product packaging) | 1. Cardboard box (IPC product packaging) 2. Electricity (reprocessing facility) 3. Sheet production (polyester laminated with polyester) |
| **Climate change** | |
| 1. Sheet production (polyester laminated with polyester) 2. Waste disposal cardboard box (landfill) 3. Loop sheet production (nylon) | 1. Waste disposal cardboard box (landfill) 2. Cardboard box (IPC product packaging) 3. Waste disposal cardboard box (landfill) |
